# Supplementary material
Source: Springer Nature journal article supplement (https://www.springermedizin.de/resource/supplementary/12943_2009_496_MOESM1_ESM.pdf/9554120)

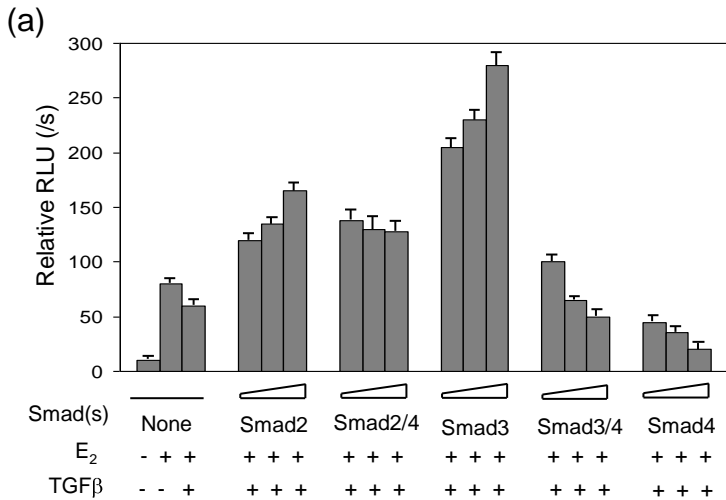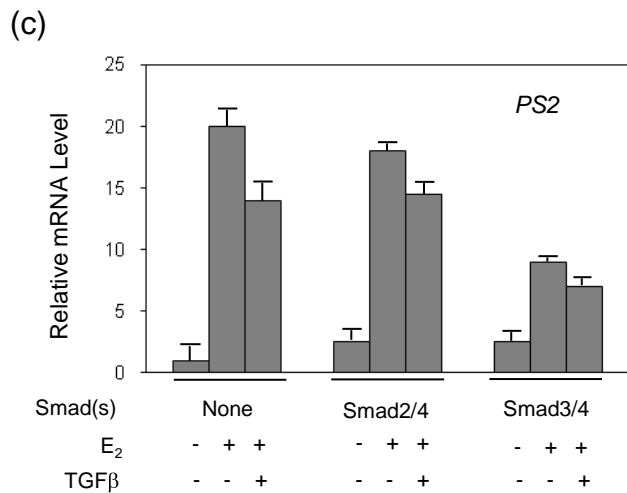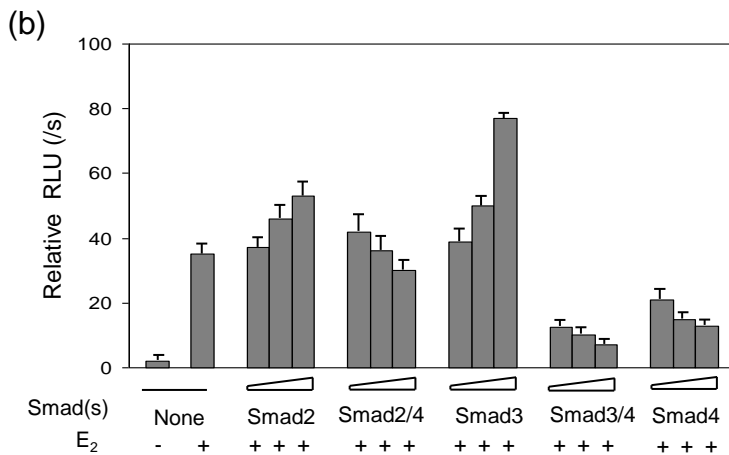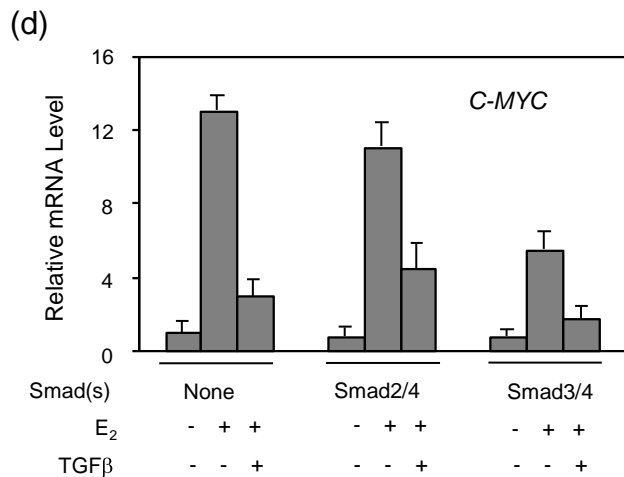

Supplement: MOESM1 [file 9554120]
